# Supplementary material
Source: PubMed Central journal article supplement (PMC2932585)
Supplement: 1004207107_pnas.1004207107_SI.pdf [file 1004207107_pnas.1004207107_SI.pdf]

# Supporting Information

Mander et al. 10.1073/pnas.1004207107

## SI Text

### SI Materials and Methods. Collection of macrofossils at Astartekløft.

Each plant bed was census-collected for a total of 48 hours by excavating four small quarries spaced two to five metres apart laterally as constrained by the nature of the outcrop (1). Plant beds 1.5 and 6 were census-collected for a total of eight hours each (1). Macrofossils were collected from each quarry by an individual worker (1) and occurrences of macrofossils within each quarry are shown in Dataset S1.

**NMDS ordination on relative abundance data.** Ordination of the sporomorph samples using relative abundance data (with singletons removed) results in the same grouping of samples as “Wisconsin” standardized data (Fig. S1). The grouping is statistically significant using a Kruskal–Wallis test: NMDS Coordinate 1 (KW = 26.98<sub>24,9,3,4</sub>  $p < 0.0001$ ); NMDS Coordinate 2 (KW = 12.67<sub>24,9,3,4</sub>  $p = 0.0054$ ). Ordination on relative abundance data is likely to be sensitive to the most abundant taxa. In this respect, plant bed 5 differs from plant beds 1 to 4 by a two-fold rise in the relative abundance of *Baculatisporites comaumensis* (~35%), an increase in the frequency of *Uvaesporites reissingerii* (~15%), and a decrease in the frequency of *Riccisporites tuberculatus* (~8%).

**Details of plant groups at Astartekløft.** (i) Ferns, comprising all representatives of the class Filicopsida (Tables S2 and S3); (ii) Conifers and Corystosperms, comprising all representatives of the class Coniferopsida and the order Corystospermales (Tables S2 and S3). This order of seed-ferns has been included owing to the dubious botanical affinities of *Alisporites* and grains

of the *Pinuspollenites* morphotype (Table S3 and ref. 2); (iii) Monosulcate Producers, comprising all representatives of the classes Cycadopsida, Ginkgopsida, Bennettitopsida, and the order Peltaspermales (Tables S2 and S3). This group contains many clades because the parent plants produced simple monosulcate pollen grains of the *Monosulcites/Cycadopites* and *Chasmatosporites* morphotypes (Table S3 and ref. 3). Mosses, liverworts, and lycopods are absent from census-collected macrofossils from Astartekløft (1) and horsetails constituted <6% of the total flora in both the macrofossil and sporomorph records (Table S1). These groups were not included in the analysis of agreement. Sporomorphs of unknown botanical affinities at the class level account for less than 7% of the total assemblage in each plant bed (Table S1).

## Other Supporting Information Files

### Dataset S1

Data matrix showing occurrences of macrofossil genera in each plant bed at Astartekløft. The total number of macrofossils recorded from each plant bed is shown, and these occurrences are broken into collections from each plant bed made by individual collectors during census collection (see ref. 1 for a detailed description of macrofossil collection techniques). Where a macrofossil could not be assigned to an individual collector, the occurrence is shown in the column labeled C/U (Collector Unknown).

### Dataset S2 (XLS)

Data matrix showing occurrences of sporomorphs from samples from each plant bed at Astartekløft analyzed in this study.

1. McElwain JC, Popa ME, Hesselbo SP, Haworth M, Surlyk F (2007) Macroecological responses of terrestrial vegetation to climatic and atmospheric change across the Triassic/Jurassic boundary in East Greenland. *Paleobiology* 33:547–573.

2. Leslie AB (2008) Interpreting the function of saccate pollen in ancient conifers and other seed plants. *Int J Plant Sci* 169:1038–1045.

3. Balme BE (1995) Fossil in situ spores and pollen grains: An annotated catalogue. *Rev Palaeobot Palyno* 87:81–323.

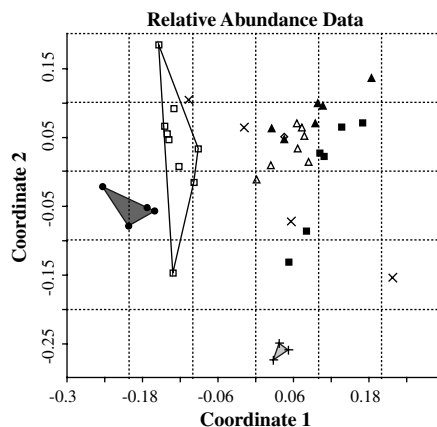

**Fig. S1.** Nonmetric multidimensional scaling plot of relative abundance sporomorph data. Samples from plant bed 5 represented by open squares and enclosed within an unshaded envelope. Samples from plant bed 6 represented by vertical crosses and enclosed within a pale gray envelope, and samples from plant bed 7 represented by closed circles and enclosed within a dark gray envelope.

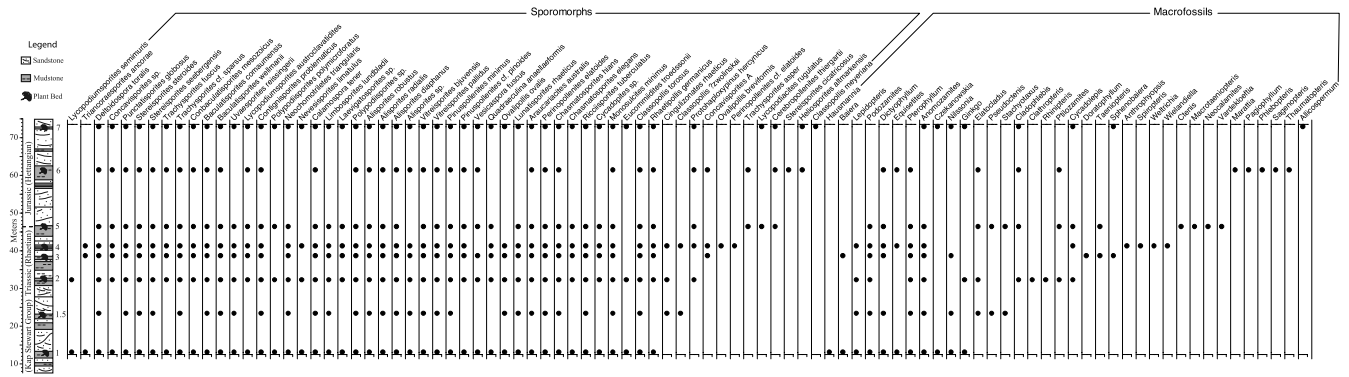

Fig. S2. Range chart of Sporomorphs and Macrofossils at Astartekløft. Occurrences are shown binned at "bed level."

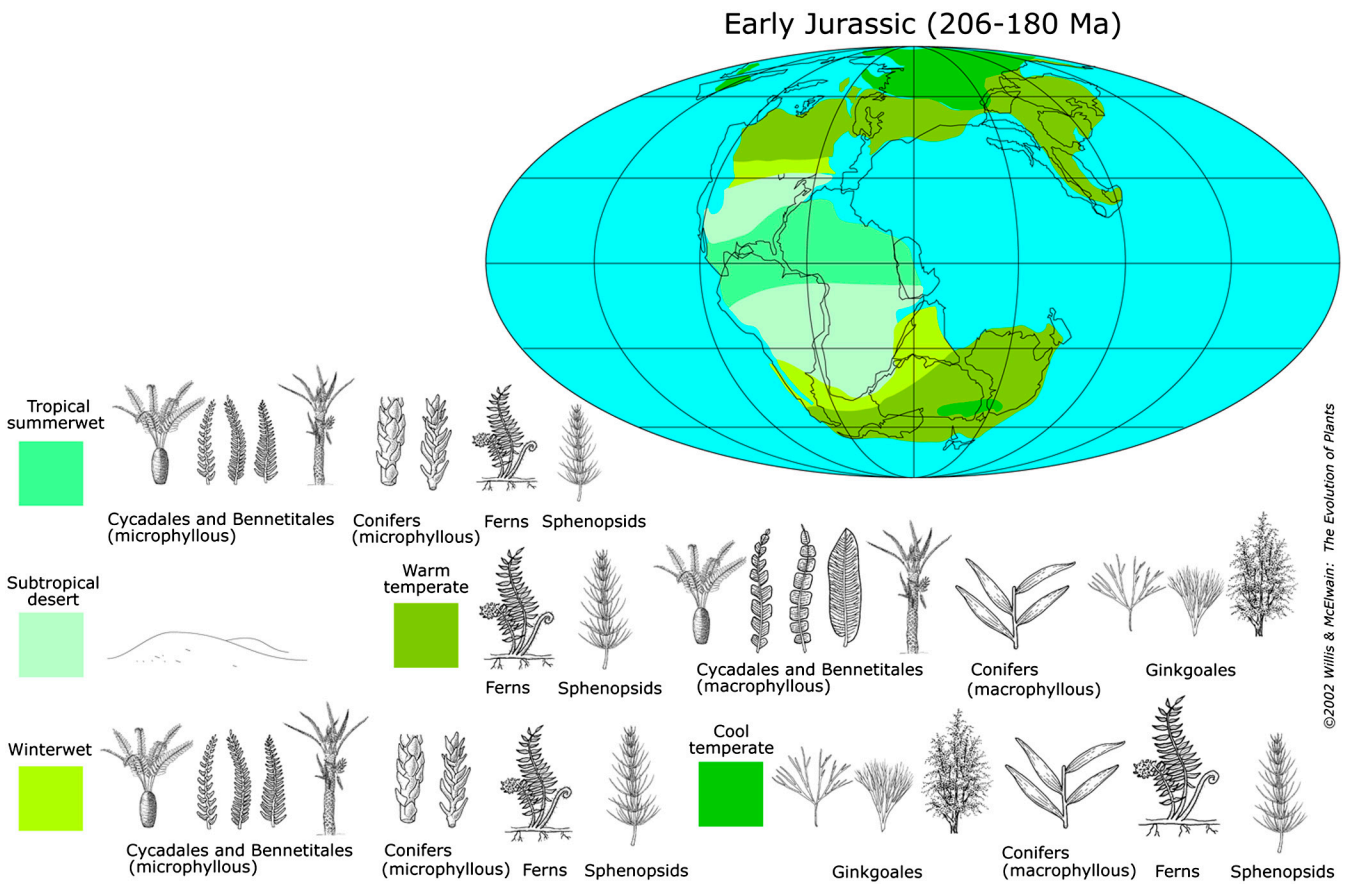

Fig. S3. Biome map of the Early Jurassic world (from ref. 1).

Willis KJ, McElwain JC (2002) *The Evolution of Plants* (Oxford University Press, Oxford), pp 378.

**Table S1. Number of individuals and percentages of each plant group in the macrofossil and sporomorph records from each plant bed at Astartekløft**

| Plant Group           | Individuals<br>(n) and<br>percentage | Plant bed |       |       |       |       |       |       |       |       |
|-----------------------|--------------------------------------|-----------|-------|-------|-------|-------|-------|-------|-------|-------|
|                       |                                      | 7         | 6     | 5     | 4     | 3     | 2     | 1.5   | 1     |       |
| Macrofossils          | Ferns                                | <i>n</i>  | 22    | 98    | 4     | 63    | 1     | 41    | 20    | 4     |
|                       |                                      | %         | 2.66  | 77.78 | 1.07  | 11.45 | 0.18  | 16.53 | 33.33 | 2.56  |
|                       | Conifers                             | <i>n</i>  | 0     | 18    | 316   | 3     | 490   | 37    | 6     | 29    |
|                       |                                      | %         | 0.00  | 14.29 | 84.49 | 0.55  | 87.97 | 14.92 | 10.00 | 18.59 |
|                       | Monosulcate producers                | <i>n</i>  | 797   | 5     | 39    | 477   | 62    | 169   | 34    | 116   |
|                       |                                      | %         | 96.37 | 3.97  | 10.43 | 86.73 | 11.13 | 68.15 | 56.67 | 74.36 |
|                       | Other seed-ferns                     | <i>n</i>  | 0     | 3     | 10    | 0     | 0     | 1     | 0     | 0     |
|                       |                                      | %         | 0.00  | 2.38  | 2.67  | 0     | 0.00  | 0.40  | 0.00  | 0.00  |
|                       | Horsetails                           | <i>n</i>  | 0     | 2     | 2     | 5     | 0     | 0     | 0     | 7     |
|                       |                                      | %         | 0.00  | 1.59  | 0.53  | 0.91  | 0.00  | 0.00  | 0.00  | 4.49  |
|                       | <i>Incertae Sedis</i>                | <i>n</i>  | 8     | 0     | 3     | 2     | 4     | 0     | 0     | 0     |
|                       |                                      | %         | 0.97  | 0.00  | 0.80  | 0.36  | 0.72  | 0.00  | 0.00  | 0.00  |
| Sporomorphs           | Ferns                                | <i>n</i>  | 858   | 936   | 1444  | 730   | 503   | 697   | 80    | 330   |
|                       |                                      | %         | 60.94 | 86.43 | 45.04 | 34.13 | 34.10 | 27.57 | 22.16 | 13.87 |
|                       | Conifers and Cystosperms             | <i>n</i>  | 312   | 85    | 669   | 359   | 170   | 478   | 74    | 444   |
|                       |                                      | %         | 22.16 | 7.85  | 20.87 | 16.78 | 11.53 | 18.91 | 20.50 | 18.66 |
|                       | Monosulcate producers                | <i>n</i>  | 53    | 4     | 41    | 26    | 27    | 50    | 5     | 48    |
|                       |                                      | %         | 3.76  | 0.37  | 1.28  | 1.22  | 1.83  | 1.98  | 1.39  | 2.02  |
|                       | Other seed-ferns                     | <i>n</i>  | 29    | 10    | 29    | 60    | 15    | 69    | 4     | 67    |
|                       |                                      | %         | 2.06  | 0.92  | 0.90  | 2.81  | 1.02  | 2.73  | 1.11  | 2.82  |
|                       | Horsetails                           | <i>n</i>  | 15    | 21    | 133   | 13    | 10    | 18    | 16    | 32    |
|                       |                                      | %         | 1.07  | 1.94  | 4.15  | 0.61  | 0.68  | 0.71  | 4.43  | 1.35  |
|                       | Mosses                               | <i>n</i>  | 22    | 9     | 32    | 10    | 3     | 29    | 7     | 16    |
|                       |                                      | %         | 1.56  | 0.83  | 1.00  | 0.47  | 0.20  | 1.15  | 1.94  | 0.67  |
|                       | Lycopods                             | <i>n</i>  | 22    | 2     | 590   | 101   | 468   | 234   | 48    | 195   |
|                       |                                      | %         | 1.56  | 0.18  | 18.40 | 4.72  | 31.73 | 9.26  | 13.30 | 8.20  |
|                       | ?Gnetales                            | <i>n</i>  | 2     | 0     | 0     | 0     | 0     | 1     | 0     | 1     |
|                       |                                      | %         | 0.14  | 0.00  | 0.00  | 0.00  | 0.00  | 0.04  | 0.00  | 0.04  |
|                       | <i>Ricciisporites tuberculatus</i>   | <i>n</i>  | 1     | 0     | 239   | 801   | 220   | 865   | 118   | 1189  |
|                       |                                      | %         | 0.07  | 0.00  | 7.45  | 37.45 | 14.92 | 34.22 | 32.69 | 49.98 |
| <i>Incertae Sedis</i> | <i>n</i>                             | 94        | 16    | 29    | 39    | 59    | 87    | 9     | 57    |       |
|                       | %                                    | 6.68      | 1.48  | 0.90  | 1.82  | 4.00  | 3.44  | 2.49  | 2.40  |       |

**Table S2. Higher classification of the plant macrofossils analyzed in this present paper**

| Genus                    | Order                 | Class                 |
|--------------------------|-----------------------|-----------------------|
| <i>Allicospermum</i>     | —                     | <i>Incertae sedis</i> |
| <i>Anomozamites</i>      | Bennettitales         | Bennetitopsida        |
| <i>Anthrophyopsis</i>    | —                     | <i>Incertae sedis</i> |
| <i>Baiera</i>            | Ginkgoales            | Ginkgopsida           |
| <i>Cladophlebis</i>      | Filicales             | Filicopsida           |
| <i>Clathropteris</i>     | Filicales             | Filicopsida           |
| <i>Ctenis</i>            | Cycadales             | Cycadopsida           |
| <i>Cycadolepis</i>       | Bennettitales         | Bennetitopsida        |
| <i>Czekanowskia</i>      | Czekanowskiales       | Ginkgopsida           |
| <i>Dictyophyllum</i>     | Filicales             | Filicopsida           |
| <i>Doratophyllum</i>     | Cycadales             | Cycadopsida           |
| <i>Elatocladus</i>       | Coniferales           | Coniferopsida         |
| <i>Equisetites</i>       | Equisetales           | Sphenopsida           |
| <i>Ginkgo</i>            | Ginkgoales            | Ginkgopsida           |
| <i>Hausmannia</i>        | Filicales             | Filicopsida           |
| <i>Lepidopteris</i>      | Peltaspermales        | Pteridospermopsida    |
| <i>Macrotaeniopteris</i> | —                     | <i>Incertae sedis</i> |
| <i>Marattia</i>          | Marattiales           | Filicopsida           |
| <i>Neocalamites</i>      | Equisetales           | Sphenopsida           |
| <i>Nilssonia</i>         | Nilssoniales          | Cycadopsida           |
| <i>Pagiophyllum</i>      | Coniferales           | Coniferopsida         |
| <i>Phlebopteris</i>      | Filicales             | Filicopsida           |
| <i>Podozamites</i>       | Coniferales           | Coniferopsida         |
| <i>Pseudoctenis</i>      | Cycadales             | Cycadopsida           |
| <i>Pterophyllum</i>      | Bennettitales         | Bennetitopsida        |
| <i>Ptilozamites</i>      | <i>Incertae sedis</i> | Pteridospermopsida    |
| <i>Rhinopteris</i>       | Marattiales           | Filicopsida           |
| <i>Sagenopteris</i>      | Caytonales            | Pteridospermopsida    |
| <i>Sphenobaiera</i>      | Ginkgoales            | Ginkgopsida           |
| <i>Spiropteris</i>       | Filicales             | Filicopsida           |
| <i>Stachyotaxus</i>      | Coniferales           | Coniferopsida         |
| <i>Taeniopteris</i>      | —                     | <i>Incertae sedis</i> |
| <i>Thaumatopteris</i>    | Filicales             | Filicopsida           |
| <i>Vardekloeftia</i>     | Bennettitales         | Bennetitopsida        |
| <i>Weltrichia</i>        | Bennettitales         | Bennetitopsida        |
| <i>Wielandiella</i>      | Bennettitales         | Bennetitopsida        |

Table S3. Botanical affinities of the sporomorph taxa analyzed in this present paper

| Sporomorph taxon                             | Order                                                   | Class                                                           |
|----------------------------------------------|---------------------------------------------------------|-----------------------------------------------------------------|
| <i>Alisporites diaphanus</i>                 | Coniferales; Corystospermales                           | Coniferopsida; Pteridospermopsida                               |
| <i>Alisporites radialis</i>                  | Coniferales; Corystospermales                           | Coniferopsida; Pteridospermopsida                               |
| <i>Alisporites robustus</i>                  | Coniferales; Corystospermales                           | Coniferopsida; Pteridospermopsida                               |
| <i>Alisporites</i> sp.                       | Coniferales; Corystospermales                           | Coniferopsida; Pteridospermopsida                               |
| <i>Araucariacites australis</i>              | Coniferales                                             | Coniferopsida                                                   |
| <i>Baculatisporites comaumensis</i>          | Filicales                                               | Filicopsida                                                     |
| <i>Baculatisporites wellmanii</i>            | Filicales                                               | Filicopsida                                                     |
| <i>Calamospora tener</i>                     | Equisetales                                             | Sphenopsida                                                     |
| <i>Cerebropollenites thiergartii</i>         | Coniferales                                             | Coniferopsida                                                   |
| <i>Chasmatosporites elegans</i>              | Cycadales; Ginkgoales                                   | Cycadopsida; Ginkgopsida                                        |
| <i>Chasmatosporites hians</i>                | Cycadales; Ginkgoales                                   | Cycadopsida; Ginkgopsida                                        |
| <i>Cingulizonates rhaeticus</i>              | —                                                       | Lycopsida                                                       |
| <i>Classopollis?</i> <i>zwoleinskai</i>      | Coniferales                                             | Coniferopsida                                                   |
| <i>Classopollis meyeriana</i>                | Coniferales                                             | Coniferopsida                                                   |
| <i>Classopollis torosus</i>                  | Coniferales                                             | Coniferopsida                                                   |
| <i>Conbaculatisporites mesozoicus</i>        | Filicales                                               | Filicopsida                                                     |
| <i>Concavisporites</i> A                     | Filicales                                               | Filicopsida                                                     |
| <i>Concavisporites</i> sp.                   | Filicales                                               | Filicopsida                                                     |
| <i>Contignisporites problematicus</i>        | —                                                       | <i>Incertae sedis</i>                                           |
| <i>Cycadopites</i> sp.                       | Cycadales; Ginkgoales; Peltaspermales;<br>Bennettitales | Cycadopsida; Ginkgopsida; Pteridospermopsida;<br>Bennetitopsida |
| <i>Deltoidospora toralis</i>                 | Filicales                                               | Filicopsida                                                     |
| <i>Eucommiidites troedssonii</i>             | Erdtmanithecales                                        | <i>Incertae sedis</i>                                           |
| <i>Heliosporites altmarkensis</i>            | —                                                       | Lycopsida                                                       |
| <i>Laevigatosporites</i> sp.                 | Marattiales                                             | Filicopsida                                                     |
| <i>Limbosporites lundbladii</i>              | —                                                       | Lycopsida                                                       |
| <i>Lunatisporites rhaeticus</i>              | Coniferales; Corystospermales                           | Coniferopsida; Pteridospermopsida                               |
| <i>Lycopodiacidites rugulatus</i>            | —                                                       | Filicopsida                                                     |
| <i>Lycopodiumsporites</i>                    | —                                                       | Lycopsida                                                       |
| <i>  austroclavatidites</i>                  | —                                                       | Lycopsida                                                       |
| <i>Lycopodiumsporites semimuris</i>          | —                                                       | Lycopsida                                                       |
| <i>Monosulcites minimus</i>                  | Bennettitales                                           | Bennetitopsida                                                  |
| <i>Neochomotriletes triangularis</i>         | —                                                       | <i>Incertae sedis</i>                                           |
| <i>Nevesisporites limatulus</i>              | —                                                       | <i>Incertae sedis</i>                                           |
| <i>Ovalipollis breviformis</i>               | —                                                       | <i>Incertae sedis</i>                                           |
| <i>Ovalipollis ovalis</i>                    | —                                                       | <i>Incertae sedis</i>                                           |
| <i>Perinopollenites</i> cf. <i>elatoides</i> | Coniferales                                             | Coniferopsida                                                   |
| <i>Perinopollenites elatoides</i>            | Coniferales                                             | Coniferopsida                                                   |
| <i>Pinuspollenites</i> cf. <i>pinoides</i>   | ?Coniferales                                            | Coniferopsida; Pteridospermopsida                               |
| <i>Pinuspollenites minimus</i>               | ?Coniferales                                            | Coniferopsida; Pteridospermopsida                               |
| <i>Polypodiisporites</i>                     | Filicales                                               | Filicopsida                                                     |
| <i>  polymicroforatus</i>                    | —                                                       | Filicopsida                                                     |
| <i>Polypodiisporites</i> sp.                 | Filicales                                               | Filicopsida                                                     |
| <i>Protohaploxypinus hercynicus</i>          | Coniferales; Glossopteridales                           | Coniferopsida; Pteridospermopsida                               |
| <i>Punctatisporites globosus</i>             | Filicales; Marattiales                                  | Filicopsida                                                     |
| <i>Quadraeculina anaellaeformis</i>          | Coniferales                                             | Coniferopsida                                                   |
| <i>Rhaetipollis germanicus</i>               | —                                                       | <i>Incertae sedis</i>                                           |
| <i>Ricciisporites tuberculatus</i>           | ?Marchantiales                                          | ?Marchantiopsida                                                |
| <i>Stereisporites cicatricosus</i>           | Sphagnales                                              | Sphagnopsida                                                    |
| <i>Stereisporites seebergensis</i>           | Sphagnales                                              | Sphagnopsida                                                    |
| <i>Stereisporites stereoides</i>             | Sphagnales                                              | Sphagnopsida                                                    |
| <i>Trachysporites asper</i>                  | —                                                       | Filicopsida                                                     |
| <i>Trachysporites</i> cf. <i>sparsus</i>     | —                                                       | Filicopsida                                                     |
| <i>Trachysporites fuscus</i>                 | —                                                       | Filicopsida                                                     |
| <i>Triancoraesporites ancorae</i>            | —                                                       | Lycopsida                                                       |
| <i>Uvaesporites reissingerii</i>             | Selaginellales                                          | Lycopsida                                                       |
| <i>Vesicaspora fuscus</i>                    | —                                                       | Pteridospermopsida                                              |
| <i>Vitreisporites bjuvensis</i>              | Caytonales                                              | Pteridospermopsida                                              |
| <i>Vitreisporites pallidus</i>               | Caytonales                                              | Pteridospermopsida                                              |
